# Supplementary material for: A shifting ecological baseline after wolf extirpation
Source: Oxford University Press journal article supplement (doi:10.1093/biosci/biae034), 2024-06-19
Supplement: biae034_supplemental_file.pdf [file biae034_supplemental_file.pdf]

## **Supplemental File S1**

Predator decline and shifting baselines: Are the landscapes we study a “sick patient”?

By William J. Ripple, Christopher Wolf, Robert L. Beschta, Apryle D. Craig, Zachary S. Curcija, Erick J. Lundgren, Lauren C. Satterfield, Samuel T. Woodrich, Aaron J. Wirsing

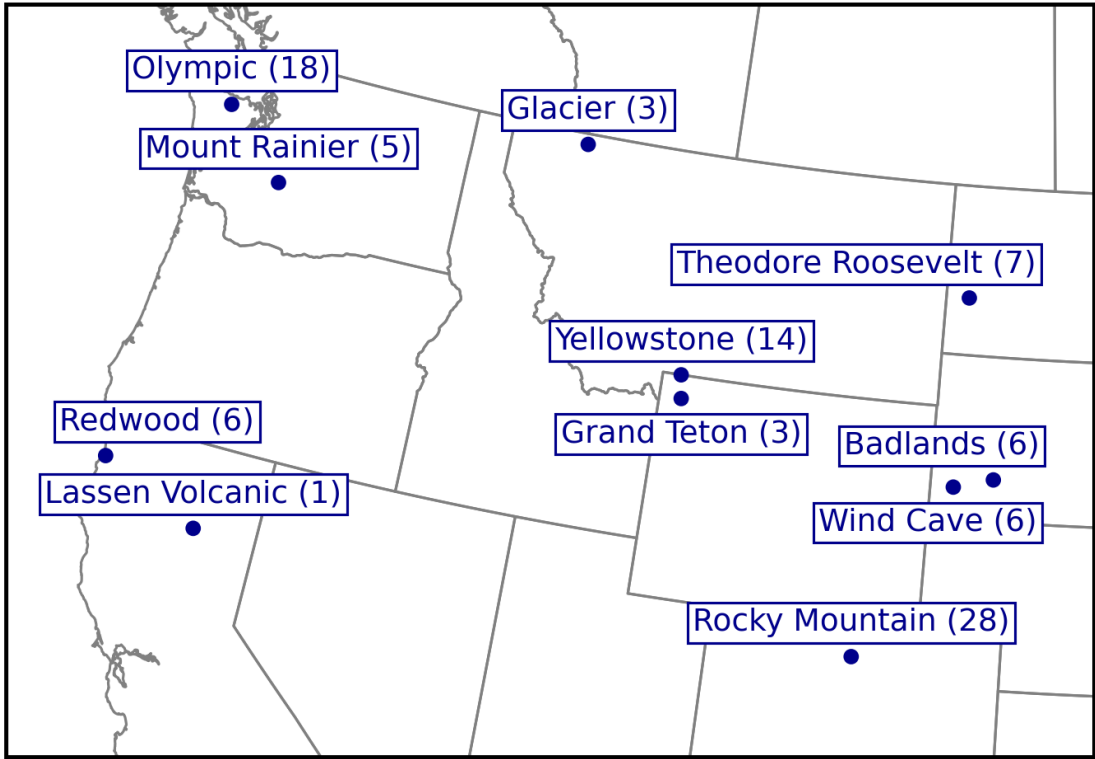

**Figure S1. Locations of national parks.** We considered all national parks in the Western United States where wolves were historically present. For each park, the number of associated theses and journal articles that we obtained is shown in parentheses.

**Table S1. Summary of observations regarding ungulates and plants following the displacement/extirpation of large predators in three northwestern US national parks.**

Source: Beschta and Ripple (2009).

| National Park                                       | Summary of observations                                                                                                                                                                                                                                                                                                                                                                                                                                                                                                                                                                                                                                                                                                                                                                                                                                                                                                                                                                                                                                                                                                                                                                                                                                |
|-----------------------------------------------------|--------------------------------------------------------------------------------------------------------------------------------------------------------------------------------------------------------------------------------------------------------------------------------------------------------------------------------------------------------------------------------------------------------------------------------------------------------------------------------------------------------------------------------------------------------------------------------------------------------------------------------------------------------------------------------------------------------------------------------------------------------------------------------------------------------------------------------------------------------------------------------------------------------------------------------------------------------------------------------------------------------------------------------------------------------------------------------------------------------------------------------------------------------------------------------------------------------------------------------------------------------|
| Olympic National Park (western portion of the park) | <p>With wolves functionally extirpated by 1910 and a hunting ban on elk that began in 1905, the Olympic peninsula's elk population began to rapidly increase and significant browsing of riparian shrubs was observed within a decade (Bailey 1918). As herbivory impacts continued, palatable shrub and tree species were increasingly unable to grow above the browse level of elk (Murie 1935, Schwartz 1939, Newman 1954). A deterioration of plant communities led park service biologist E.L. Sumner to surmise that wolves had likely been an essential "natural check" preventing elk overpopulation (Sumner 1938). He further indicated: "Unless some substitute for this now absent controlling factor is provided, serious destruction of certain plants and even their total elimination in certain places through inability to reproduce will no doubt occur."</p>                                                                                                                                                                                                                                                                                                                                                                        |
| Yellowstone National Park (northern winter range)   | <p>By 1920, and perhaps earlier, wolves had been functionally extirpated from Yellowstone's northern elk winter ranges. Approximately a decade later, Rush (1933) found that the northern range was "badly overgrazed", sheet erosion was occurring, and much of the "rich top soil" had washed away. Subsequently, Grimm (1939) concluded that herbaceous plants became depleted each winter due to overutilization by ungulates. His studies of aspen indicated that excessive browsing by elk threatened the "existence of aspen on the winter range." Even though the Park Service reduced elk numbers in an attempt to lessen their foraging impacts, by the mid-1950s the cumulative effects of grazing and trampling by elk had removed lush thickets of willows from meadows, impacted sagebrush, and depleted aspen stands "that cannot be replaced while elk consume reproduction" (NPS 1956). Bunchgrasses, which normally comprised the bulk of an elk's diet, were also in "poor condition." The diminishment of northern range plant communities led A. Leopold (1949) to simply conclude: "Thus the Yellowstone has lost its wolves and cougars, with the result that elk are ruining the flora, particularly on the winter range."</p> |
| Wind Cave National Park                             | <p>Journal records of naturalist G.B. Grinnell during the 1874 Custer expedition to the Black Hills chronicled abundant large carnivores, ungulates, berry-producing shrubs, wildflowers, and beaver along their route (Ludlow 1875). For example, serviceberry, a browse species that today is uncommon in the park, was "very abundant, both in the form of low bushes in open, dry, sparse copses and as thickets in the valleys." Grinnell also noted "almost all the streams which we passed were dammed in many places by beaver." However, discovery of gold in 1874 and a rush of miners to the Black Hills were soon followed by large herds of cattle and sheep. Thus, large predators were quickly removed from the landscape. By the mid-1880s continuous grazing by livestock had resulted in a "dangerous depletion of the range" and thus "beaver had begun to disappear and their dams began to let go" (Palais 1942). When the park was established in 1905, it inherited not only an area generally devoid of large predators, but one where native plant communities had experienced several decades of intensive herbivory by domestic ungulates (Smith unpublished<sup>1</sup>).</p>                                              |

<sup>1</sup> Smith J. Rare Tree and shrub survey in Wind Cave National Park. Hot Springs, SD: Wind Cave National Park Files. Unpublished.

**Table S2. Species in the American West affected by coyote predation as listed by the U.S. Fish and Wildlife Service and species of concern according to Natural Heritage programs.** Adapted from Table 1 in Ripple et al. (2013).

| <b>Common name</b>          | <b>Scientific name(s)</b>                                                                                                             | <b>Status</b>                     |
|-----------------------------|---------------------------------------------------------------------------------------------------------------------------------------|-----------------------------------|
| Black-footed ferret         | <i>Mustela nigripes</i>                                                                                                               | Endangered                        |
| Pygmy rabbit                | <i>Brachylagus idahoensis</i>                                                                                                         | Endangered                        |
| San Joaquin kit fox         | <i>Vulpes macrotis mutica</i>                                                                                                         | Endangered                        |
| Columbian white-tailed deer | <i>Odocoileus virginianus leucurus</i>                                                                                                | Endangered                        |
| Least tern                  | <i>Sterna antillarum</i>                                                                                                              | Endangered                        |
| Whooping crane              | <i>Grus americana</i>                                                                                                                 | Endangered                        |
| Olympic marmot              | <i>Marmota olympus</i>                                                                                                                | Species of concern WA             |
| Swift fox                   | <i>Vulpes velox</i>                                                                                                                   | Species of concern CO, MT, NM, WY |
| Sandhill crane              | <i>Grus canadensis tabida</i>                                                                                                         | Species of concern CO, OR, WA     |
| Snowshoe hare               | <i>Lepus americanus</i> , <i>Lepus americanus klamathensis</i> , <i>Lepus americanus seclusus</i> , <i>Lepus americanus tahoensis</i> | Species of concern NM, CA, WY     |
| Long-billed curlew          | <i>Numenius americanus</i>                                                                                                            | Species of concern CO, OR         |
| Yellow-bellied marmot       | <i>Marmota flaviventris</i>                                                                                                           | Species of concern NM             |

**Table S3. List of theses and journal articles analyzed.** From left to right, the table columns show the thesis/dissertation or article identification number, associated national park, year of publication, university or journal name, author(s), title, taxonomic group(s) considered, whether or not the historical presence of wolves was considered, and a quote about wolves (or other large carnivores), if applicable. In the “Wolves?” column, theses and articles where only large carnivores other than wolves were considered by the authors are marked with an asterisk. Thesis number 32 covers two national parks: Theodore Roosevelt and Wind Cave. We have not included references in quotes in our references list; these papers can be identified using the associated document.

| #                 | National Park | Year | University/ Journal           | Author(s)              | Title                                                                                                                                       | Taxa                  | Wolves? | Quote |
|-------------------|---------------|------|-------------------------------|------------------------|---------------------------------------------------------------------------------------------------------------------------------------------|-----------------------|---------|-------|
| <b>41 theses</b>  |               |      |                               |                        |                                                                                                                                             |                       |         |       |
| <a href="#">1</a> | Badlands      | 2006 | South Dakota State University | Russell, Todd A.       | Habitat Selection by Swift Foxes in Badlands National Park and the Surrounding Area in South Dakota                                         | swift fox             | no      |       |
| <a href="#">2</a> | Badlands      | 2007 | South Dakota State University | Schroeder, Greg M.     | Effect of Coyotes and Release Site Selection on Survival and Movement of Translocated Swift Foxes in the Badlands Ecosystem of South Dakota | swift fox             | no      |       |
| <a href="#">3</a> | Badlands      | 2011 | South Dakota State University | Sasmal, Indrani        | Population Viability Analysis of Swift fox ( <i>Vulpes velox</i> ) at the Badlands National Park                                            | swift fox             | no      |       |
| <a href="#">4</a> | Badlands      | 2017 | South Dakota State University | Nevison, Sarah Ann     | Swift Foxes in Southwestern South Dakota: Assessing the Current Status of a Reintroduced Population                                         | swift fox             | no      |       |
| <a href="#">5</a> | Glacier       | 1955 | University of Montana         | Hawley, Vernon Duane   | Ecology of the marten in Glacier National Park                                                                                              | American marten       | no      |       |
| <a href="#">6</a> | Glacier       | 1968 | University of Montana         | Koterba, Wayne Douglas | Analysis of the North Fork Valley grasslands in Glacier National Park Montana                                                               | herbaceous vegetation | no      |       |
| <a href="#">7</a> | Glacier       | 1981 | University of Montana         | Burnett, Gary W.       | Movements and habitat use of American marten in Glacier National Park Montana                                                               | American marten       | no      |       |

| #                  | National Park   | Year | University/ Journal                | Author(s)             | Title                                                                                                                                                    | Taxa            | Wolves? | Quote                                                                                                                                                                                                            |
|--------------------|-----------------|------|------------------------------------|-----------------------|----------------------------------------------------------------------------------------------------------------------------------------------------------|-----------------|---------|------------------------------------------------------------------------------------------------------------------------------------------------------------------------------------------------------------------|
| <a href="#">8</a>  | Lassen Volcanic | 2007 | California State University System | Kirk, Thomas A.       | Landscape-scale habitat associations of the American marten ( <i>Martes americana</i> ) in the greater southern Cascades region of California            | American marten | yes     | Page 5: "Several top mammalian predators have been extirpated from this region including grizzly bear ( <i>Ursus arctos</i> ), gray wolf ( <i>Canis lupus</i> ) and wolverine ( <i>Gulo gulo</i> ) (USDA 2001)." |
| <a href="#">9</a>  | Mount Rainier   | 1970 | Oregon State University            | Schamberger, Melvin   | Mammals of Mount Rainier National Park                                                                                                                   | small mammals   | yes     | Pages 80-81: "At present, the wolf is thought to be absent from the park, but may perhaps wander down from the North Cascades in the future."                                                                    |
| <a href="#">10</a> | Mount Rainier   | 1970 | Central Washington University      | Meredith, Don H.      | Subalpine Cover Ecology of <i>Eutamias amoenus</i> , <i>Eutamias townsendii</i> and other small Mammals in Huckleberry Park, Mount Rainier National Park | small mammals   | no      |                                                                                                                                                                                                                  |
| <a href="#">11</a> | Mount Rainier   | 1973 | Oregon State University            | Henderson, Jan A      | Composition, distribution and succession of subalpine meadows in Mount Rainier National Park                                                             | understory      | no      |                                                                                                                                                                                                                  |
| <a href="#">12</a> | Mount Rainier   | 1987 | Oregon State University            | Cooper, Kevin Craig   | Seasonal movements and habitat use of migratory elk in Mount Rainier National Park                                                                       | elk             | no      |                                                                                                                                                                                                                  |
| <a href="#">13</a> | Olympic         | 1979 | Oregon State University            | Jenkins, Kurt Jeffrey | Home range and habitat use by Roosevelt elk in Olympic National Park, Washington                                                                         | elk             | yes     | Page 4: "Local politicians established a bounty on cougars; concurrently, settlers depleted wolf populations to protect the diminishing elk herds and to protect livestock."                                     |

| #                  | National Park | Year | University/ Journal      | Author(s)               | Title                                                                                                                                                | Taxa            | Wolves? | Quote                                                                                                                                                                                                                                            |
|--------------------|---------------|------|--------------------------|-------------------------|------------------------------------------------------------------------------------------------------------------------------------------------------|-----------------|---------|--------------------------------------------------------------------------------------------------------------------------------------------------------------------------------------------------------------------------------------------------|
| <a href="#">14</a> | Olympic       | 1982 | Oregon State University  | Leslie, David M.        | Nutritional ecology of cervids in old-growth forests in Olympic National Park, Washington                                                            | elk             | yes     | Page 8: "Wolves, <i>Canis lupus</i> , were extirpated from the Olympic Peninsula by the 1920s."                                                                                                                                                  |
| <a href="#">15</a> | Olympic       | 1986 | Oregon State University  | Schroer, Gregory L.     | Seasonal movements and distribution of migratory Roosevelt elk in the Olympic Mountains, Washington                                                  | elk             | no      |                                                                                                                                                                                                                                                  |
| <a href="#">16</a> | Olympic       | 1993 | Oregon State University  | Happe, Patricia Jenkins | Ecological relationships between cervid herbivory and understory vegetation in old-growth Sitka spruce-western hemlock forests in western Washington | understory      | yes     | Page 10: "Due to the public outcry associated with the perceived low elk numbers, bounties were established to control cougar in 1904 (wolves were extirpated by 1930)..."                                                                       |
| <a href="#">17</a> | Olympic       | 2000 | University of Washington | Riege, Dennis Alan      | Arrested succession in old fields within a temperate rain forest.                                                                                    | range condition | no      |                                                                                                                                                                                                                                                  |
| 18                 | Olympic       | 2005 | University of Washington | Fetherston, Kevin L.    | Pattern and process in mountain river valley forests                                                                                                 | trees           | no      |                                                                                                                                                                                                                                                  |
| <a href="#">19</a> | Olympic       | 2008 | University of Montana    | Griffin, Suzanne Cox    | Demography and ecology of a declining endemic   The Olympic marmot                                                                                   | marmot          | yes     | Page 24: "... predator-prey dynamics on the peninsula have been altered by the extirpation of the wolf ( <i>Canis lupus</i> ) from the peninsula in the early 20th century and the simultaneous arrival of the coyote ( <i>C. latrans</i> ) ..." |

| #                  | National Park | Year | University/ Journal                 | Author(s)                 | Title                                                                                                                                                                                              | Taxa   | Wolves? | Quote                                                                                                                                                                                                                                                                        |
|--------------------|---------------|------|-------------------------------------|---------------------------|----------------------------------------------------------------------------------------------------------------------------------------------------------------------------------------------------|--------|---------|------------------------------------------------------------------------------------------------------------------------------------------------------------------------------------------------------------------------------------------------------------------------------|
| <a href="#">20</a> | Olympic       | 2008 | University of Washington            | Stolnack, Scott A.        | Patterns of conifer establishment and vigor on montane river floodplains in Olympic National Park, Washington, USA                                                                                 | trees  | no      |                                                                                                                                                                                                                                                                              |
| <a href="#">21</a> | Olympic       | 2014 | University of Washington            | Lewis, Jeffrey<br>Charles | Post-Release Movements, Survival, and Resource Selection of Fishers ( <i>Pekania pennanti</i> ) Translocated to the Olympic Peninsula of Washington.                                               | fisher | no      |                                                                                                                                                                                                                                                                              |
| <a href="#">22</a> | Olympic       | 2020 | University of Washington            | Murphy-Williams, Maia.    | Climate Change Impacts in Alpine Meadows: Environmental Factors Correlated with the Decline of the Olympic Marmot ( <i>Marmota olympus</i> ) Population in Olympic National Park, Washington State | marmot | yes     | Page 35: "Without the competition from wolves, invasive coyotes arrived in the Olympics. Predation on the Olympic marmot by coyotes has been shown in previous research to be a significant factor in marmot decline (Figure 1) (Witczuk et al. 2013, Griffin et al. 2008)." |
| <a href="#">23</a> | Redwood       | 2010 | California State University System  | Teraoka, Emily            | Structure and composition of old-growth and unmanaged second-growth riparian forests at Redwood National Park, USA                                                                                 | trees  | no      |                                                                                                                                                                                                                                                                              |
| <a href="#">24</a> | Redwood       | 2016 | Texas State University – San Marcos | Kolbe, Nicholas R.        | Density-Dependent Not - Independent Factors Influence Roosevelt Elk Recruitment in the Bald Hills of Redwood National Park                                                                         | elk    | no      |                                                                                                                                                                                                                                                                              |



| #                  | National Park  | Year | University/ Journal       | Author(s)                 | Title                                                                                          | Taxa   | Wolves? | Quote                                                                                                                                                                                                                                                        |
|--------------------|----------------|------|---------------------------|---------------------------|------------------------------------------------------------------------------------------------|--------|---------|--------------------------------------------------------------------------------------------------------------------------------------------------------------------------------------------------------------------------------------------------------------|
| <a href="#">25</a> | Rocky Mountain | 2013 | Colorado State University | Kaczynski, Kristen Mannix | Riparian willow decline in Colorado: interactions of ungulate browsing, native birds and fungi | shrubs | yes     | Page 13: "Elk populations have increased since the early 1900's due to the extirpation of wolves, while moose were introduced into Colorado in the late 1970's"                                                                                              |
| <a href="#">26</a> | Rocky Mountain | 2015 | Colorado State University | Craig, Apryle Dawn        | Impacts of elk management and riparian condition on songbirds in Rocky Mountain National Park  | shrubs | yes     | Abstract: ". . . riparian willow (Salix spp.) communities in Rocky Mountain National Park (RMNP) are declining as a result of a trophic cascade involving the local extinction of wolves (Canis lupus) and an exponential increase in elk (Cervus elaphus)." |
| <a href="#">27</a> | Rocky Mountain | 2019 | Colorado State University | Laurel, DeAnna J.         | Effects of beaver engineering on downstream fluxes in Colorado mountain streams                | shrubs | yes     | Page 15: "Wolves were hunted to extinction in Rocky Mountain National Park during the 1920s and the numbers of elk and moose within the national park rose steadily during the 20th century."                                                                |

| #                  | National Park                    | Year | University/ Journal                 | Author(s)                 | Title                                                                                                                              | Taxa          | Wolves? | Quote                                                                                                                                                                                                                               |
|--------------------|----------------------------------|------|-------------------------------------|---------------------------|------------------------------------------------------------------------------------------------------------------------------------|---------------|---------|-------------------------------------------------------------------------------------------------------------------------------------------------------------------------------------------------------------------------------------|
| <a href="#">28</a> | Rocky Mountain                   | 2021 | Colorado State University           | Contento, Taryn Elizabeth | Willow growth response to altered disturbance regimes in Rocky Mountain National Park: herbivory, water levels, and hay production | shrubs        | yes*    | Page 6: "Increased herbivory from native species is often caused by mass extinction that led to the loss of apex predators and subsequent growth of prey species population that feed on riparian vegetation (Berger et al., 2001). |
| <a href="#">29</a> | Theodore Roosevelt               | 1988 | Montana State University            | Sullivan, Mark Gerald     | Distribution, habitat use, and food habits of reintroduced elk in Theodore Roosevelt National Park, North Dakota                   | elk           | yes*    | Page 32: "The cow-calf ratio in September 1985 was 45:100. This was less than expected for an area devoid of large predators."                                                                                                      |
| <a href="#">30</a> | Theodore Roosevelt               | 1989 | Montana State University            | Westfall, Jerry Allen     | The ecology of reintroduced elk in Theodore Roosevelt National Park, North Dakota                                                  | elk           | no      |                                                                                                                                                                                                                                     |
| <a href="#">31</a> | Theodore Roosevelt               | 1998 | Montana State University            | Lewis, Stephen Thomas     | Evaluation of habitat use by a transplanted bighorn sheep herd in Theodore Roosevelt National Park                                 | bighorn sheep | no      |                                                                                                                                                                                                                                     |
| <a href="#">32</a> | Theodore Roosevelt and Wind Cave | 2010 | Texas State University – San Marcos | Miller, Shelley D.        | Comparative Study of the Spatial Organization and Zoogeomorphic Effects of Black-tailed Prairie Dogs                               | prairie dog   | no      |                                                                                                                                                                                                                                     |
| <a href="#">33</a> | Wind Cave                        | 1998 | South Dakota State University       | Bauman, Peter J.          | The Wind Cave National Park Elk Herd: Home Ranges, Seasonal Movements, and Alternative Control Methods                             | elk           | yes*    | Page 6: "Currently, natural regulation of elk populations in WICA is not feasible, principally because there are few suitable predators found in this relatively small, fenced park (Varland et al. 1978)."                         |

| #                  | National Park | Year | University/ Journal           | Author(s)           | Title                                                                                                      | Taxa            | Wolves? | Quote                                                                                                                                                                                                                                                                                                       |
|--------------------|---------------|------|-------------------------------|---------------------|------------------------------------------------------------------------------------------------------------|-----------------|---------|-------------------------------------------------------------------------------------------------------------------------------------------------------------------------------------------------------------------------------------------------------------------------------------------------------------|
| <a href="#">34</a> | Wind Cave     | 2001 | South Dakota State University | Duckwitz, Jeremy J. | Small Mammal Survey of Wind Cave National Park.                                                            | small mammals   | no      |                                                                                                                                                                                                                                                                                                             |
| <a href="#">35</a> | Wind Cave     | 2004 | South Dakota State University | Sievers, Jaret D.   | Factors Influencing a Declining Pronghorn Population in Wind Cave National Park, South Dakota              | pronghorn       | no      |                                                                                                                                                                                                                                                                                                             |
| <a href="#">36</a> | Wind Cave     | 2007 | South Dakota State University | Chronert, Jamie M.  | Ecology of the Coyote ( <i>Canis latrans</i> ) at Wind Cave National Park.                                 | coyote          | yes     | Page 1: "Several explanations have been put forth for coyote expansion across North America, including the extirpation of wolves . . . In Yellowstone National Park, for instance, the extirpation of gray wolves may have permitted higher coyote population densities . . . (Crabtree and Sheldon 1999)." |
| <a href="#">37</a> | Yellowstone   | 1966 | Colorado State University     | Oldemeyer, John Lee | Winter ecology of bighorn sheep in Yellowstone National Park                                               | bighorn sheep   | no      |                                                                                                                                                                                                                                                                                                             |
| <a href="#">38</a> | Yellowstone   | 1968 | Colorado State University     | Woolf, Alan         | Summer ecology of bighorn sheep in Yellowstone National Park                                               | bighorn sheep   | no      |                                                                                                                                                                                                                                                                                                             |
| <a href="#">39</a> | Yellowstone   | 1981 | Montana State University      | Tyers, Daniel Bruce | The condition of the northern winter range in Yellowstone National Park : a discussion of the controversy. | range condition | yes     | Page 86: "One was the near elimination of the grey wolf and mountain lion that disturbed the mutually beneficial relationship between predators and plant eaters.                                                                                                                                           |

| #                          | National Park | Year | University/ Journal            | Author(s)                                                                             | Title                                                                                         | Taxa                | Wolves? | Quote                                                                                                                                                                                                                                                                                             |
|----------------------------|---------------|------|--------------------------------|---------------------------------------------------------------------------------------|-----------------------------------------------------------------------------------------------|---------------------|---------|---------------------------------------------------------------------------------------------------------------------------------------------------------------------------------------------------------------------------------------------------------------------------------------------------|
| <a href="#">40</a>         | Yellowstone   | 1990 | Utah State University          | Kay, Charles E.                                                                       | Yellowstone's Northern Elk Herd: A Critical Evaluation of the "Natural Regulation" paradigm   | range condition     | yes     | Page 2:<br>"...government agents eliminated all wolves and most mountain lions from the park by the late 1920s. After this had been accomplished, the Park Service came to believe that its eradication of native predators had permitted the northern elk herd to irrupt and overuse its range." |
| <a href="#">41</a>         | Yellowstone   | 1994 | Montana State University       | Sikes, Derek Scott                                                                    | Influences of ungulate carcasses on Coleopteran communities in Yellowstone National Park, USA | scavengers          | no      |                                                                                                                                                                                                                                                                                                   |
| <b>55 journal articles</b> |               |      |                                |                                                                                       |                                                                                               |                     |         |                                                                                                                                                                                                                                                                                                   |
| 42                         | Badlands      | 1998 | Journal of Wildlife Management | Biggins, DE; Godbey, JL; Hanebury, LR; Luce, B; Marinari, PE; Matchett, MR; Vargas, A | The Effect of Rearing Methods on Survival of Reintroduced Black-Footed Ferrets                | black-footed ferret | no      |                                                                                                                                                                                                                                                                                                   |

| #  | National Park | Year | University/ Journal                                       | Author(s)                                                                                                     | Title                                                                               | Taxa            | Wolves? | Quote                                                                                                                                                                           |
|----|---------------|------|-----------------------------------------------------------|---------------------------------------------------------------------------------------------------------------|-------------------------------------------------------------------------------------|-----------------|---------|---------------------------------------------------------------------------------------------------------------------------------------------------------------------------------|
| 43 | Badlands      | 2013 | Conservation Genetics                                     | Sasmal, Indrani; Jenks, Jonathan A.; Waits, Lisette P.; Gonda, Michael G.; Schroeder, Greg M.; Datta, Shubham | Genetic Diversity in a Reintroduced Swift Fox Population                            | swift fox       | yes     | Page 93: "The species declined during the mid-1800s, largely due to habitat loss and poisoning targeted at wolves ( <i>Canis lupus</i> ) and coyotes ( <i>Canis latrans</i> )." |
| 44 | Grand Teton   | 1991 | Applied Animal Behaviour Science                          | Boyce, MS                                                                                                     | Migratory Behavior and Management of Elk ( <i>Cervus-Elaphus</i> )                  | elk             | yes     | Page 243 :The major predator on elk in Jackson Hole was the wolf ( <i>Canis lupus</i> ) before its extirpation during the 1920s (Weaver, 1979)."                                |
| 45 | Grand Teton   | 1996 | Canadian Journal of Zoology- Revue Canadienne De Zoologie | Smith, BL; Anderson, SH                                                                                       | Patterns of Neonatal Mortality of Elk in Northwest Wyoming                          | elk             | no      |                                                                                                                                                                                 |
| 46 | Grand Teton   | 1998 | Journal of Wildlife Management                            | Smith, BL; Anderson, SH                                                                                       | Juvenile Survival and Population Regulation of the Jackson Elk Herd                 | elk             | no      |                                                                                                                                                                                 |
| 47 | Mount Rainier | 1999 | Journal of Range Management                               | Sharrow, SH; Kuntz, DE                                                                                        | Plant Response to Defoliation in a Subalpine Green Fescue Community                 | range condition | no      |                                                                                                                                                                                 |
| 48 | Olympic       | 1993 | Northwest Science                                         | Schroer, GL; Jenkins, KJ; Moorhead, BB                                                                        | Roosevelt Elk Selection of Temperate Rain-Forest Seral Stages in Western Washington | elk             | no      |                                                                                                                                                                                 |

| #  | National Park | Year | University/ Journal                                                           | Author(s)                                             | Title                                                                                                       | Taxa            | Wolves? | Quote                                                                                                                                                                            |
|----|---------------|------|-------------------------------------------------------------------------------|-------------------------------------------------------|-------------------------------------------------------------------------------------------------------------|-----------------|---------|----------------------------------------------------------------------------------------------------------------------------------------------------------------------------------|
| 49 | Olympic       | 1994 | Northwest Science                                                             | Woodward, A; Schreiner, EG; Houston, DB; Moorhead, BB | Ungulate-Forest Relationships in Olympic-National-Park - Retrospective Exclosure Studies                    | range condition | no      |                                                                                                                                                                                  |
| 50 | Olympic       | 1996 | Canadian Journal of Forest Research- Revue Canadienne De Recherche Forestiere | Schreiner, EG; Krueger, KA; Happe, PJ; Houston, DB    | Understory Patch Dynamics and Ungulate Herbivory in Old-Growth Forests of Olympic National Park, Washington | range condition | no      |                                                                                                                                                                                  |
| 51 | Olympic       | 2008 | Ecohydrology                                                                  | Beschta, Robert L.; Ripple, William J.                | Wolves, Trophic Cascades, and Rivers in the Olympic National Park, USA                                      | trees           | yes     | Page 118: "Gray wolves ( <i>Canis lupus</i> ) were extirpated in the early 1900s from the Olympic Peninsula of northwestern Washington."                                         |
| 52 | Olympic       | 2013 | Journal of Mammalogy                                                          | Witczuk, Julia; Pagacz, Stanislaw; Mills, L. Scott    | Disproportionate Predation on Endemic Marmots by Invasive Coyotes                                           | marmot          | yes     | Page 711: "One unknown but potentially important factor is the absence of gray wolves, extirpated from the Olympic Peninsula about 1930 (Scheffer 1995)."                        |
| 53 | Olympic       | 2015 | Journal of Zoology                                                            | Witczuk, J.; Pagacz, S.; Gliwicz, J.; Mills, L. S.    | Niche Overlap Between Sympatric Coyotes and Bobcats in Highland Zones of Olympic Mountains, Washington      | marmot          | yes     | Page 2: "The subsequent increase in coyote abundance closely paralleled a dramatic decrease and eventual extinction of the wolf <i>Canis lupus</i> population (Scheffer, 1995)." |

| #  | National Park | Year | University/ Journal                   | Author(s)                                                                                                                                           | Title                                                                                                                                   | Taxa            | Wolves? | Quote                                                                                                                                                                                                                                         |
|----|---------------|------|---------------------------------------|-----------------------------------------------------------------------------------------------------------------------------------------------------|-----------------------------------------------------------------------------------------------------------------------------------------|-----------------|---------|-----------------------------------------------------------------------------------------------------------------------------------------------------------------------------------------------------------------------------------------------|
| 54 | Olympic       | 2017 | Earth Surface Processes and Landforms | East, Amy E.; Jenkins, Kurt J.; Happe, Patricia J.; Bountry, Jennifer A.; Beechie, Timothy J.; Mastin, Mark C.; Sankey, Joel B.; Randle, Timothy J. | Channel-Planform Evolution in Four Rivers of Olympic National Park, Washington, USA: The Roles of Physical Drivers and Trophic Cascades | range condition | yes     | Page 1011: ". . . to investigate whether physical or trophic-cascade-driven ecological factors – excessive elk impacts after wolves were extirpated a century ago – are the dominant drivers of channel planform in these gravel-bed rivers." |
| 55 | Olympic       | 2021 | Ecosphere                             | Woodward, A.; Jenkins, K. J.; Harmon, M. E.                                                                                                         | Plant Community Succession Following Ungulate Exclusion in a Temperate Rainforest                                                       | range condition | yes     | Page 3: ". . . the hypothesis that wolf extirpation has created a trophic cascade whereby elk numbers are adversely impacting river morphology through their negative effects on riparian forest vegetation (Beschta and Ripple 2008)."       |
| 56 | Redwood       | 2014 | Journal of Mammalogy                  | Starns, Heath D.; Ricca, Mark A.; Duarte, Adam; Weckerly, Floyd W.                                                                                  | Climatic and Density Influences on Recruitment in an Irruptive Population of Roosevelt Elk                                              | elk             | no      |                                                                                                                                                                                                                                               |

| #  | National Park  | Year | University/ Journal       | Author(s)                                                                     | Title                                                                                        | Taxa  | Wolves? | Quote                                                                                                                                               |
|----|----------------|------|---------------------------|-------------------------------------------------------------------------------|----------------------------------------------------------------------------------------------|-------|---------|-----------------------------------------------------------------------------------------------------------------------------------------------------|
| 57 | Redwood        | 2015 | California Fish and Game  | Kolbe, Nicholas R.; Weckerly, Floyd W.                                        | Home-Range Overlap of Roosevelt Elk Herds in the Bald Hills of Redwood National Park         | elk   | no      |                                                                                                                                                     |
| 58 | Redwood        | 2018 | California Fish and Game  | Tolliver, James D. Weckerly, Floyd W.                                         | Abundance, Habitat and Occupancy of Roosevelt Elk in the Bald Hills of Redwood National Park | elk   | no      |                                                                                                                                                     |
| 59 | Redwood        | 2021 | Basic and Applied Ecology | Weckerly, Floyd W.; Kolbe, Nicholas R.; Schmidt, Kristin N.; Bensen, Keith J. | Prescribed Fire Has Slight Influence on Roosevelt Elk Population Dynamics                    | elk   | no      |                                                                                                                                                     |
| 60 | Rocky Mountain | 1997 | Ecography                 | Baker, WL; Munroe, JA; Hessler, AE                                            | The Effects of Elk on Aspen in the Winter Range in Rocky Mountain National Park              | aspen | yes     | Page 155: "Major predators, such as gray wolf <i>canis lupus</i> and grizzly bear <i>Ursus arctos</i> , were extirpated before park establishment." |



| #  | National Park  | Year | University/ Journal         | Author(s)                                                                                             | Title                                                                                                                                                                                               | Taxa            | Wolves? | Quote |
|----|----------------|------|-----------------------------|-------------------------------------------------------------------------------------------------------|-----------------------------------------------------------------------------------------------------------------------------------------------------------------------------------------------------|-----------------|---------|-------|
| 61 | Rocky Mountain | 1997 | Landscape Ecology           | Stohlgren, TJ; Coughenour, MB; Chong, GW; Binkley, D; Kalkhan, MA; Schell, LD; Buckley, DJ; Berry, JK | Landscape Analysis of Plant Diversity                                                                                                                                                               | range condition | no      |       |
| 62 | Rocky Mountain | 1999 | Landscape Ecology           | Suzuki, K; Suzuki, H; Binkley, D; Stohlgren, TJ                                                       | Aspen Regeneration in the Colorado Front Range: Differences at Local and Landscape Scales                                                                                                           | aspen           | no      |       |
| 63 | Rocky Mountain | 1999 | Oecologia                   | Alstad, KP; Welker, JM; Williams, SA; Trlica, MJ                                                      | Carbon and Water Relations of <i>Salix Monticola</i> in Response to Winter Browsing and Changes in Surface Water Hydrology: An Isotopic Study Using $\delta^{13}\text{C}$ and $\delta^{18}\text{O}$ | willow          | no      |       |
| 64 | Rocky Mountain | 2001 | Journal of Range Management | Menezes, RSC; Elliott, ET; Valentine, DW; Williams, SA                                                | Carbon and Nitrogen Dynamics in Elk Winter Ranges                                                                                                                                                   | willow          | no      |       |

| #  | National Park  | Year | University/ Journal            | Author(s)                                                         | Title                                                                                                                                                                                                | Taxa   | Wolves? | Quote                                                                                                                                                        |
|----|----------------|------|--------------------------------|-------------------------------------------------------------------|------------------------------------------------------------------------------------------------------------------------------------------------------------------------------------------------------|--------|---------|--------------------------------------------------------------------------------------------------------------------------------------------------------------|
| 65 | Rocky Mountain | 2001 | Oecologia                      | Peinetti, HR;<br>Menezes, RSC;<br>Coughenour, MB                  | Changes Induced by Elk Browsing in the Aboveground Biomass Production and Distribution of Willow ( <i>Salix Monticola</i> Bebb): Their Relationships With Plant Water, Carbon, and Nitrogen Dynamics | willow | no      |                                                                                                                                                              |
| 66 | Rocky Mountain | 2002 | Climatic Change                | Wang, GM;<br>Hobbs, NT;<br>Singer, FJ;<br>Ojima, DS;<br>Lubow, BC | Impacts of Climate Changes on Elk Population Dynamics in Rocky Mountain National Park, Colorado, USA                                                                                                 | elk    | yes*    | Page 206: "Many of these areas lack large capable predators."                                                                                                |
| 67 | Rocky Mountain | 2002 | Journal of Wildlife Management | Lubow, BC;<br>Singer, FJ;<br>Johnson, TL;<br>Bowden, DC           | Dynamics of Interacting Elk Populations Within and Adjacent to Rocky Mountain National Park                                                                                                          | elk    | yes     | Page 773: ". . . but 2 major predators (wolves [ <i>Canis lupus</i> ] and grizzly bears [ <i>Ursus arctos</i> ]) have been eliminated from this system. . ." |
| 68 | Rocky Mountain | 2002 | Journal of Wildlife Management | Zeigenfus, LC;<br>Singer, FJ;<br>Williams, SA;<br>Johnson, TL     | Influences of Herbivory and Water on Willow in Elk Winter Range                                                                                                                                      | willow | yes     | Page 788: " Large predators and some herbivores have been eliminated. . ."                                                                                   |
| 69 | Rocky Mountain | 2002 | Landscape Ecology              | Peinetti, HR;<br>Kalkhan, MA;<br>Coughenour, MB                   | Long-Term Changes in Willow Spatial Distribution on the Elk Winter Range of Rocky Mountain National Park (USA)                                                                                       | willow | yes*    | Page 352 "...possibly due in part to predator eradication. . ."                                                                                              |

| #  | National Park  | Year | University/Journal                | Author(s)                                                            | Title                                                                                             | Taxa            | Wolves? | Quote                                                                                                                                                                                                                                                                               |
|----|----------------|------|-----------------------------------|----------------------------------------------------------------------|---------------------------------------------------------------------------------------------------|-----------------|---------|-------------------------------------------------------------------------------------------------------------------------------------------------------------------------------------------------------------------------------------------------------------------------------------|
| 70 | Rocky Mountain | 2003 | Landscape Ecology                 | Kaye, MW; Stohlgren, TJ; Binkley, D                                  | Aspen Structure and Variability in Rocky Mountain National Park, Colorado, USA                    | aspen           | no      |                                                                                                                                                                                                                                                                                     |
| 71 | Rocky Mountain | 2003 | Environmental Management          | Weisberg, PJ; Coughenour, MB                                         | Model-Based Assessment of Aspen Responses to Elk Herbivory in Rocky Mountain National Park, USA   | aspen           | yes     | Page 167: "Prior to their extirpation, wolves may have limited the RMNP herd to fluctuations within a range of 300–800 elk (Coughenour 2001)."                                                                                                                                      |
| 72 | Rocky Mountain | 2004 | Journal of Wildlife Management    | Schoeneker, KA; Singer, FJ; Zeigenfuss, LC; Binkley, D; Menezes, RSC | Effects of Elk Herbivory on Vegetation and Nitrogen Processes                                     | range condition | yes*    | Page 837: "The elimination of large predators, disruption and loss of migration routes, and the creation of artificial forage sources in towns and developed areas have contributed to possible overabundance and/or overconcentrations of elk in some areas (Wagner et al. 1995)." |
| 73 | Rocky Mountain | 2005 | Western North American Naturalist | Bender, LC; Cook, JG                                                 | Nutritional Condition of Elk in Rocky Mountain National Park                                      | elk             | no      |                                                                                                                                                                                                                                                                                     |
| 74 | Rocky Mountain | 2005 | Ecological Applications           | Kaye, MW; Binkley, D; Stohlgren, TJ                                  | Effects of Conifers and Elk Browsing on Quaking Aspen Forests in the Central Rocky Mountains, USA | aspen           | no      |                                                                                                                                                                                                                                                                                     |

| #  | National Park  | Year | University/ Journal                                       | Author(s)                                                                     | Title                                                                                                                          | Taxa   | Wolves? | Quote                                                                                                                                     |
|----|----------------|------|-----------------------------------------------------------|-------------------------------------------------------------------------------|--------------------------------------------------------------------------------------------------------------------------------|--------|---------|-------------------------------------------------------------------------------------------------------------------------------------------|
| 75 | Rocky Mountain | 2005 | Rangeland Ecology & Management                            | Baker, BW;<br>Peinetti, HR;<br>Coughenour, MB                                 | Resilience of Willow Stems After Release From Intense Elk Browsing                                                             | willow | yes     | Page 575: "The elimination of large predators has reduced predation risk in some riparian areas. . ."                                     |
| 76 | Rocky Mountain | 2005 | Canadian Journal of Botany- Revue Canadienne De Botanique | Gage, EA;<br>Cooper, DJ                                                       | Patterns of Willow Seed Dispersal, Seed Entrapment, and Seedling Establishment in a Heavily Browsed Montane Riparian Ecosystem | willow | yes*    | Page 685: "However, because elk in Rocky Mountain National Park lack predators, there appears to be no effective constraint on browsing." |
| 77 | Rocky Mountain | 2005 | Ecological Applications                                   | Baker, BW;<br>Ducharme, HC;<br>Mitchell, DCS;<br>Stanley, TR;<br>Peinetti, HR | Interaction of Beaver and Elk Herbivory Reduces Standing Crop of Willow                                                        | willow | yes*    | Page 111: "Large herbivores congregate in these areas because they lack disturbance from large predators. . ."                            |
| 78 | Rocky Mountain | 2008 | Forest Ecology and Management                             | Binkley, Dan                                                                  | Age Distribution of Aspen in Rocky Mountain National Park, USA                                                                 | aspen  | yes*    | Page 797: "increased browsing that may have resulted from extirpation of predators. . ."                                                  |
| 79 | Rocky Mountain | 2008 | Journal of Environmental Management                       | Bradford, John B.;<br>Hobbs, N.<br>Thompson                                   | Regulating Overabundant Ungulate Populations: An Example for Elk in Rocky Mountain National Park, Colorado                     | elk    | no      |                                                                                                                                           |
| 80 | Rocky Mountain | 2009 | Isotopes in Environmental and Health Studies              | Menezes, Romulo S. C.                                                         | Isotopic Evidence of the Effects of Herbivory and Landscape Position on Plant Nitrogen Sources in a Riparian Ecosystem         | willow | no      |                                                                                                                                           |

| #  | National Park      | Year | University/ Journal                 | Author(s)                                                                           | Title                                                                                       | Taxa            | Wolves? | Quote                                                                                                                                                                |
|----|--------------------|------|-------------------------------------|-------------------------------------------------------------------------------------|---------------------------------------------------------------------------------------------|-----------------|---------|----------------------------------------------------------------------------------------------------------------------------------------------------------------------|
| 81 | Rocky Mountain     | 2012 | Ecosphere                           | Baker, Bruce W.; Raul Peinetti, H.; Coughenour, Michael B.; Johnson, Therese L.     | Competition Favors Elk Over Beaver in a Riparian Willow Ecosystem                           | elk             | yes     | Page 9: "The elk population grew quickly in the absence of wolves ( <i>Canis lupus</i> ) and grizzly bears ( <i>Ursus arctos</i> ), which also had been extirpated." |
| 82 | Rocky Mountain     | 2015 | Forest Ecology and Management       | Kaczynski, Kristen M.; Cooper, David J.                                             | Post-Fire Response of Riparian Vegetation in a Heavily Browsed Environment                  | range condition | no      |                                                                                                                                                                      |
| 83 | Rocky Mountain     | 2016 | Ecosphere                           | Schweiger, E. William; Grace, James B.; Cooper, David; Bobowski, Ben; Britten, Mike | Using Structural Equation Modeling to Link Human Activities to Wetland Ecological Integrity | range condition | yes     | Page 5: "Human activities extirpated ( <i>Canis lupus</i> ) wolves largely before the park was established."                                                         |
| 84 | Theodore Roosevelt | 2002 | Journal of Environmental Management | Irby, LR; Norland, JE; Westfall, JA; Sullivan, MA                                   | Evaluation of a Forage Allocation Model for Theodore Roosevelt National Park                | range condition | no      |                                                                                                                                                                      |
| 85 | Theodore Roosevelt | 2007 | Journal of Wildlife Management      | Sargeant, Glen A.; Oehler, Michael W., Sr.                                          | Dynamics of Newly Established Elk Populations                                               | elk             | no      |                                                                                                                                                                      |

| #  | National Park      | Year | University/ Journal                      | Author(s)                                              | Title                                                                                                                  | Taxa                     | Wolves? | Quote                                                                      |
|----|--------------------|------|------------------------------------------|--------------------------------------------------------|------------------------------------------------------------------------------------------------------------------------|--------------------------|---------|----------------------------------------------------------------------------|
| 86 | Theodore Roosevelt | 2014 | California Fish and Game                 | Sargeant, Glen A.; Oehler, Michael W.; Sexton, Chad L. | Use of Water Developments by Female Elk at Theodore Roosevelt National Park, North Dakota                              | elk                      | no      |                                                                            |
| 87 | Wind Cave          | 2007 | Frontiers in Ecology and the Environment | Ripple, William J.; Beschta, Robert L.                 | Hardwood Tree Decline Following Large Carnivore Loss on the Great Plains, USA                                          | oak and cottonwood trees | yes     | Page 241: "we conducted a retrospective analysis of large carnivores. . ." |
| 88 | Yellowstone        | 1991 | Journal of Wildlife Management           | DelGiudice, GD; Singer, FJ; Seal, US                   | Physiological Assessment of Winter Nutritional Deprivation in Elk of Yellowstone-National-Park                         | elk                      | no      |                                                                            |
| 89 | Yellowstone        | 1991 | Journal of Applied Ecology               | Coughenour, MB                                         | Biomass and Nitrogen Responses to Grazing of Upland Steppe on Yellowstone Northern Winter Range                        | herbaceous vegetation    | no      |                                                                            |
| 90 | Yellowstone        | 1992 | Ecology                                  | Frank, DA; McNaughton, SJ                              | The Ecology of Plants, Large Mammalian Herbivores, and Drought in Yellowstone-National-Park                            | range condition          | no      |                                                                            |
| 91 | Yellowstone        | 1993 | Oecologia                                | Frank, DA; McNaughton, SJ                              | Evidence for the Promotion of Aboveground Grassland Production by Native Large Herbivores in Yellowstone-National-Park | herbaceous vegetation    | no      |                                                                            |
| 92 | Yellowstone        | 1993 | Ecological Modelling                     | Turner, MG; Wu, YG; Romme, WH; Wallace, LL             | A Landscape Simulation-Model of Winter Foraging by Large Ungulates                                                     | elk                      | no      |                                                                            |

| #  | National Park | Year | University/ Journal                                       | Author(s)                                                    | Title                                                                                                                                    | Taxa                  | Wolves? | Quote                                                                                     |
|----|---------------|------|-----------------------------------------------------------|--------------------------------------------------------------|------------------------------------------------------------------------------------------------------------------------------------------|-----------------------|---------|-------------------------------------------------------------------------------------------|
| 93 | Yellowstone   | 1994 | Ecological Applications                                   | Turner, MG; Wu, YA; Wallace, LL; Romme, WH; Brenkert, A      | Simulating Winter Interactions Among Ungulates, Vegetation, and Fire in Northern Yellowstone Park                                        | elk                   | no      |                                                                                           |
| 94 | Yellowstone   | 1994 | Biogeochemistry                                           | Frank, DA; Inouye, RS; Huntly, N; Minshall, GW; Anderson, JE | The Biogeochemistry of a North-Temperate Grassland With Native Ungulates - Nitrogen Dynamics in Yellowstone-National-Park                | herbaceous vegetation | no      |                                                                                           |
| 95 | Yellowstone   | 1994 | Journal of Range Management                               | Singer, FJ; Mark, LC; Cates, RC                              | Ungulate Herbivory of Willows on Yellowstone Northern Winter Range                                                                       | willow                | yes     | Page 435: ". . .since wolves (Canis Lupus) are estirpated. . ."                           |
| 96 | Yellowstone   | 1994 | Canadian Journal of Zoology- Revue Canadienne De Zoologie | Singer, FJ; Norland, JE                                      | Niche Relationships Within a Guild of Ungulate Species in Yellowstone-National-Park, Wyoming, Following Release From Artificial Controls | elk                   | yes     | Page 1383: ". . .the removal of a significant predator, the gray wolf (Canis lupus). . ." |

**Table S4. Mammal irruptions following predator declines.** The table shows the top 10 wild terrestrial mammal species ranked by biomass as given in Greenspoon et al. (2023). The first four columns, taken from Table 1 of Greenspoon et al. (2023), indicate species' common name, scientific name, estimated total biomass in Mt, and estimated total population size. Where applicable, the final column contains a quote and reference related to the species' predators. For information on predator conservation status, see Wolf and Ripple (2017).

| Common                   | Scientific                    | Mass (Mt) | # (M) | Status of predators                                                                                                                                                                                                                                                                                                                                                                                                                                                                                                                                                                                                                                            |
|--------------------------|-------------------------------|-----------|-------|----------------------------------------------------------------------------------------------------------------------------------------------------------------------------------------------------------------------------------------------------------------------------------------------------------------------------------------------------------------------------------------------------------------------------------------------------------------------------------------------------------------------------------------------------------------------------------------------------------------------------------------------------------------|
| White-tailed deer        | <i>Odocoileus virginianus</i> | 2.7       | 45    | “Ungulate irruptions, primarily of deer, began to occur following the occurrence of wolf extinctions, with most of the western irruptions (80 percent) taking place between 1935 and 1945” (Ripple and Beschta 2005)                                                                                                                                                                                                                                                                                                                                                                                                                                           |
| Wild boar                | <i>Sus scrofa</i>             | 1.9       | 30    | n/a                                                                                                                                                                                                                                                                                                                                                                                                                                                                                                                                                                                                                                                            |
| African savanna elephant | <i>Loxodonta africana</i>     | 1.3       | 0.5   | n/a                                                                                                                                                                                                                                                                                                                                                                                                                                                                                                                                                                                                                                                            |
| Eastern gray kangaroo    | <i>Macropus giganteus</i>     | 0.6       | 20    | “In Australia, the native Thylacine ( <i>Thylacinus cynocephalus</i> ) was eliminated from the mainland about 5,000 years ago. Livestock grazing was introduced [...], after which the Dingo ( <i>Canis dingo</i> ) was eliminated from much of the mainland, and Indigenous hunting was suppressed [...]. This combination of actions is believed to have reduced predation/hunting pressure on the larger marsupial herbivores, and in combination with [...], has led to significant increases in the distribution and density of many large macropod species, notably the Eastern Grey Kangaroo ( <i>Macropus giganteus</i> ) [...].” (Gordon et al. 2021) |
| Mule deer                | <i>Odocoileus hemionus</i>    | 0.5       | 7     | “Results from Zion National Park generally affirm Leopold’s (1943) interpretation of the mule deer irruption on the Kaibab Plateau of Arizona and its effect on plant communities after cougar and wolf eradication” (Ripple et al. 2010)                                                                                                                                                                                                                                                                                                                                                                                                                      |



|                   |                               |     |     |                                                                                                                                                                                                                                                                       |
|-------------------|-------------------------------|-----|-----|-----------------------------------------------------------------------------------------------------------------------------------------------------------------------------------------------------------------------------------------------------------------------|
| Moose             | <i>Alces alces</i>            | 0.5 | 1.5 | “In 9 of 10 multiyear, telemetry-based studies in moose–bear–wolf systems, predation (primarily on calves) was the dominant factor affecting moose population dynamics compared with harvest, malnutrition, disease, and adverse weather [...]” (Boertje et al. 2010) |
| Red deer (elk)    | <i>Cervus elaphus</i>         | 0.5 | 2   | “Wolf and lynx predation kept red deer and roe deer below carrying capacity and constantly provided remains for scavengers” (Ordiz et al. 2021)                                                                                                                       |
| European roe deer | <i>Capreolus capreolus</i>    | 0.4 | 20  | “[...] found that roe deer densities were significantly lower in areas with sympatric wolves and lynx compared to areas with wolves alone or areas without either predator” (Ripple and Beschta 2012)                                                                 |
| Red kangaroo      | <i>Macropus rufus</i>         | 0.4 | 10  | “dingo removal was linked to a dramatic increase in red kangaroo abundance” (Hunter et al. 2018)                                                                                                                                                                      |
| Common warthog    | <i>Phacochoerus africanus</i> | 0.3 | 5   | n/a                                                                                                                                                                                                                                                                   |

## Supplemental Methods

As the basis for our study, we began with a list of all national parks in the continental Northwestern United States west of 100 degrees longitude and between 40 and 49 degrees latitude, yielding an initial total of 13 national parks. We excluded Crater Lake and North Cascades National Parks since they had few wolves historically, resulting in a final total of 11 national parks (Figure S1).

For each national park in our analysis, we searched the Open Access Theses and Dissertations website (OATD; available at OATD.org) for theses and dissertations (hereafter, “theses”) using an exact keyword match based on the full name of the national park, which covers titles, abstracts, subjects, etc. We focused on theses and dissertations rather than individual manuscripts because, by definition, these bodies of work represent in-depth field studies where a thorough historical context of the study area would be expected to be presented. To identify scientific journal articles published since 1965, we then searched the Web of Science Core Collection database for “topic” (including titles, abstracts, and keywords) matching each national park name.

For national parks where wolves were extirpated, but have since returned, we only considered theses and articles published when wolves were absent: Yellowstone prior to 1995, Glacier prior to 1985, Grand Teton prior to 1999, and Lassen Volcanic prior to 2015.

OATD indexes theses from a large set of universities and repositories. As of April, 2023, there were over 6.5 million theses indexed on OATD, including some published as early as the late 1700s. We supplemented the list of search results by adding several theses that were not included in the results.

After obtaining initial lists of theses ( $n = 433$ ) and journal articles ( $n = 126$ ), we scanned their abstracts in order to remove publications that were not relevant to terrestrial food web ecology. Specifically, we retained publications that were on topics that might be affected by wolf extirpation, only including elk (*Cervus canadensis*) and plants that elk consume, as well as coyotes and coyote prey and smaller predators. We then searched the full text of each remaining publication for the terms “wol”, “carn”, and “preda” to determine whether (1) the historical presence of wolves was considered, (2) the historical presence of wolves was not considered, but extirpated large carnivores or large predators in general were discussed, or (3) extirpated wolves, large carnivores, or large predators were not discussed at all. In the first two cases, we obtained a relevant short quote from the thesis abstract or full text.

## Supplemental References

- Bailey V. 1918. Report on investigation of elk herds in the Olympic Mountains, Washington. Olympic National Forest, Olympia, WA.
- Beschta RL, Ripple WJ. 2009. Large predators and trophic cascades in terrestrial ecosystems of the western United States. *Biological Conservation* 142: 2401–2414.
- Boertje RD, Keech MA, Paragi TF. 2010. Science and Values Influencing Predator Control for Alaska Moose Management. *Journal of Wildlife Management* 74: 917–928.
- Gordon I, Snape M, Fletcher D, Howland B, Coulson G, Festa-Bianchet M, Caley P, McIntyre S, Pople T, Wimpenny C, others. 2021. Herbivore management for biodiversity conservation: a case study of kangaroos in the Australian Capital Territory (ACT). *Ecological Management & Restoration* 22: 124–137.
- Greenspoon L, Krieger E, Sender R, Rosenberg Y, Bar-On YM, Moran U, Antman T, Meiri S, Roll U, Noor E, others. 2023. The global biomass of wild mammals. *Proceedings of the National Academy of Sciences* 120: e2204892120.
- Grimm RL. 1939. Northern Yellowstone winter range studies. *The Journal of Wildlife Management* 3: 295–306.
- Hunter DO, Lagisz M, Leo V, Nakagawa S, Letnic M. 2018. Not all predators are equal: a continent-scale analysis of the effects of predator control on Australian mammals. *Mammal Review* 48: 108–122.
- Leopold A. 1949. *A Sand County almanac and sketches here and there*. Oxford University Press.
- Ludlow W. 1875. *Report of a Reconnaissance of the Black Hills of Dakota, Made in 1874*. US Government Printing Office.
- Murie OJ. 1935. *Report on the Elk of the Olympic Peninsula*. Biological Survey.
- Newman CC. 1954. *Roosevelt Elk of Olympic National Park*. National Park Service.
- [NPS] National Park Service. 1956. *Management Plan for the Northern Elk Herd, Yellowstone National Park*, 30 November, 1956. USDI, National Park Service.
- Ordiz A, Aronsson M, Persson J, Støen O-G, Swenson JE, Kindberg J. 2021. Effects of human disturbance on terrestrial apex predators. *Diversity* 13: 68.
- Palais H. 1942. The cattle industry in the Black Hills. *The Black Hills Engineer* 28: 2–107.
- Ripple WJ, Beschta RL. 2005. Linking wolves and plants: Aldo Leopold on trophic cascades. *BioScience* 55: 613–621.
- Ripple WJ, Beschta RL. 2012. Large predators limit herbivore densities in northern forest ecosystems. *European Journal of Wildlife Research* 1–10.
- Ripple WJ, Rooney TP, Beschta RL. 2010. Large predators, deer, and trophic cascades in boreal and temperate ecosystems. *Trophic cascades: predators, prey, and the changing dynamics of nature*. Island Press, Washington, DC, USA 141–161.

Ripple WJ, Wirsing AJ, Wilmers CC, Letnic M. 2013. Widespread mesopredator effects after wolf extirpation. *Biological Conservation* 160: 70–79.

Rush WM. 1933. Northern Yellowstone elk study. Montana Fish and Game Commission.

Schwartz J. 1939. The Olympic elk study. USDA Forest Service, Olympic National Forest, Olympia, WA.

Sumner E. 1938. Special report of elk in Olympic National Park. USDI National Park Service, San Francisco, California, USA.

Wolf C, Ripple WJ. 2017. Range contractions of the world's large carnivores. *Royal Society Open Science* 4: 170052.
